# Supplementary material for: Knowing the goal: an inclusive economy that can address the public health challenges of our time
Source: HighWire-hosted journal article supplement (doi:10.1136/jech-2020-216070), 2021-06-22
Supplement: jech-2020-216070supp001_data_supplement.pdf [file jech-2020-216070supp001_data_supplement.pdf]

## **Appendix 1: Review of the grey and peer reviewed literature.**

The following bibliometric databases were searched for articles published between 1/1/1990 and 6/4/2020: Econlit; Research Papers in Economics (RePEc); Web of Science; Applied Social Science Index and Abstracts (ASSIA); International Bibliography of the Social Sciences (IBSS), Sociology Research Database (SocIndex), ProQuest Public Health, Psychinfo, EMBASE and Medline). The search terms used included: “inclusive growth” and “inclusive economy”. The following websites were manually searched: UK Government, Scottish Government, World Bank, Asian Development Bank, African Development Bank, United Nations, International Policy Centre for Inclusive Growth, the Organisation for Economic Co-operation and Development, World Economic Forum, Cities Alliance, Royal Society of Arts, Centre for Local Economic Strategies, the Institute for Public Policy Research, the Joseph Rowntree Foundation, Poverty and Inequality Commission and Wellbeing Economy Alliance. Publications identified were imported and deduplicated in Refworks. Covidence platform was used for title and abstract as well as full text screening.

Publications were excluded if they did not define concepts relevant to inclusive economy, were not available in English or were blogs. Selected material meeting the criteria were screened by a single reviewer from a pool of three reviewers. Definitions of inclusive economy or similar concepts such as inclusive growth were extracted by a single reviewer into MS Excel. Extracted material was thematically analysed; concepts defining aspects of an inclusive economy were coded until saturation was reached – i.e. until additional material did not identify any new inclusive economy concepts. The frequency that an inclusive economy was mentioned was specifically not taken into account in the synthesis: published material tended to build on previous reports, therefore older concepts were more frequently mentioned.

After 56 reports (Appendix 2) saturation was reached – no new defining factors were identified. Twenty-two separate concepts of an inclusive economy were identified from the published definitions (Appendix 3).
