# Supplementary material for: Knowing the goal: an inclusive economy that can address the public health challenges of our time
Source: HighWire-hosted journal article supplement (doi:10.1136/jech-2020-216070), 2021-06-22
Supplement: jech-2020-216070supp002_data_supplement.pdf [file jech-2020-216070supp002_data_supplement.pdf]

**Appendix 2: Publications that provides a definition of inclusive growth**

| Reference                |       | Attributes of an inclusive economy identified in the published definition |                                                      |                                                  |                     |
|--------------------------|-------|---------------------------------------------------------------------------|------------------------------------------------------|--------------------------------------------------|---------------------|
|                          |       | Equitable access to resources to participate in the economy               | Equitable distribution of the outputs of the economy | The economy operates within planetary boundaries | Economy is designed |
| Adham [1]                | 2015  |                                                                           | √                                                    |                                                  | √                   |
| Alfredsson [2]           | 2014  |                                                                           |                                                      | √                                                | √                   |
| Ali [3]                  | 2007a |                                                                           | √                                                    |                                                  |                     |
| Ali [4]                  | 2007b | √                                                                         | √                                                    |                                                  |                     |
| Aoyagi [5]               | 2015  |                                                                           | √                                                    |                                                  |                     |
| Aslam [6]                | 2016  | √                                                                         | √                                                    |                                                  | √                   |
| Bakker [7]               | 2016  | √                                                                         | √                                                    |                                                  |                     |
| Bakker [8]               | 2019  |                                                                           | √                                                    |                                                  |                     |
| Barber [9]               | 2017  | √                                                                         | √                                                    |                                                  |                     |
| Biswas [10]              | 2016  | √                                                                         | √                                                    |                                                  | √                   |
| Boarini [11]             | 2018  | √                                                                         | √                                                    |                                                  |                     |
| Budd [12]                | 2013  |                                                                           |                                                      |                                                  |                     |
| Burch [13]               | 2018  |                                                                           | √                                                    | √                                                | √                   |
| Carayannis [14]          | 2014  |                                                                           | √                                                    |                                                  | √                   |
| Carayannis [15]          | 2017  |                                                                           |                                                      |                                                  | √                   |
| Chan-Yuan Wong [16]      | 2018  | √                                                                         | √                                                    |                                                  | √                   |
| Cichowicz [17]           | 2018  | √                                                                         | √                                                    |                                                  |                     |
| deHaan [18]              | 2015  | √                                                                         | √                                                    |                                                  |                     |
| European Commission [19] | 2010  | √                                                                         | √                                                    |                                                  |                     |
| Feshari [20]             | 2017  | √                                                                         | √                                                    |                                                  |                     |
| Fowowe [21]              | 2019  |                                                                           | √                                                    |                                                  |                     |
| Gromling [22]            | 2019  | √                                                                         | √                                                    |                                                  |                     |
| Gupta [23]               | 2015  | √                                                                         | √                                                    |                                                  |                     |
| Anchovichina [24]        | 2009  | √                                                                         | √                                                    |                                                  |                     |
| Hampton [25]             | 2017  | √                                                                         | √                                                    |                                                  |                     |
| Hasmath [26]             | 2015  | √                                                                         | √                                                    | √                                                |                     |
| Heshmati [27]            | 2019  | √                                                                         | √                                                    |                                                  |                     |
| Kanbur [28]              | 2010  |                                                                           | √                                                    |                                                  |                     |
| Khan [29]                | 2016  |                                                                           | √                                                    |                                                  |                     |
| Kumah [30]               | 2013  |                                                                           | √                                                    |                                                  |                     |
| Lederman [31]            | 2013  |                                                                           | √                                                    |                                                  |                     |
| Lee [32]                 | 2013  | √                                                                         | √                                                    |                                                  | √                   |
| Lee [33]                 | 2018  | √                                                                         | √                                                    |                                                  |                     |
| Lupton [34]              | 2016  |                                                                           | √                                                    |                                                  |                     |

|                          |      |   |   |   |   |
|--------------------------|------|---|---|---|---|
| Meyer [35]               | 2019 |   | √ |   |   |
| Mitchell [36]            | 2012 | √ | √ |   |   |
| Mitra [37]               | 2018 | √ | √ | √ |   |
| Naqvi [38]               | 2012 |   | √ |   |   |
| OECD [39]                | 2014 |   | √ |   |   |
| Osmani [40]              | 2008 | √ | √ |   |   |
| Pacetti [41]             | 2016 | √ | √ | √ |   |
| Ranieri [42]             | 2013 | √ | √ |   |   |
| Rauniyar [43]            | 2010 | √ | √ |   |   |
| Reed [44]                | 2019 | √ | √ |   |   |
| Rodríguez-Pos [45]       | 2015 |   | √ |   |   |
| Sabir [46]               | 2019 | √ | √ |   |   |
| Samans [47]              | 2015 |   | √ |   |   |
| Scottish Government [48] | 2015 | √ | √ |   |   |
| Sengupta [49]            | 2010 |   | √ |   |   |
| Statham [50]             | 2019 |   | √ |   | √ |
| Sud [51]                 | 2015 | √ | √ |   | √ |
| Swain [52]               | 2013 |   | √ |   |   |
| Swamy [53]               | 2010 |   |   |   |   |
| Vickers [54]             | 2017 | √ | √ |   |   |
| Viney [55]               | 2013 | √ | √ |   |   |
| Zhuang [56]              | 2008 | √ | √ |   |   |

- 1 Adham KA, Sarkam SF, Mohd Ghanie SK, et al. A cybernetics approach to inclusive growth analysis: A case of one district. *Syst Pract Action Res* 2015;**28**:595-612.
- 2 Alfredsson E, Wijkman A. The inclusive green economy. *Shaping society to serve* 2014.
- 3 Ali I, Son HH. Measuring Inclusive Growth. *Asian Development Review* 2007;**24**:11-31.
- 4 Ali I. Inequality and the Imperative for Inclusive Growth in Asia. *Asian Development Review* 2007;**24**:1-16.
- 5 Aoyagi C, Ganelli G. Asia's Quest for Inclusive Growth Revisited. *Journal of Asian Economics* 2015;**40**:29-46.
- 6 Aslam A, Zulfiqar K. Policy Framework for Inclusive Growth: A Case Study of Selected Asian Countries. *Forman Journal of Economic Studies* 2016;**12**:21-40.
- 7 Bakker M, Messerli HR. Inclusive growth versus pro-poor growth: Implications for tourism development. *Tour Hosp Res* 2016.
- 8 Bakker M. A Conceptual Framework for Identifying the Binding Constraints to Tourism-Driven Inclusive Growth. *Tourism Planning & Development* 2019;**16**:575-590.
- 9 Barber S. The Brexit environment demands that deliberative democracy meets inclusive growth. *RLCE* 2017;**32**:219-239.
- 10 Biswas A. Insight on the evolution and distinction of inclusive growth. *Dev Pract* 2016;**26**:503-516.

- 11 Boarini R, Causa O, Fleurbaey M, et al. Reducing inequalities and strengthening social cohesion through inclusive growth: a roadmap for action. *Economics* 2018;**12**:1-26.
- 12 Budd L. EUROPE 2020: a strategy in search of a regional policy rationale? *Policy Studies* 2013;**34**:274.
- 13 Burch D, McInroy N. We need an Inclusive Economy not Inclusive Growth.
- 14 Carayannis EG, Rakhmatullin R. The Quadruple/Quintuple Innovation Helixes and Smart Specialisation Strategies for Sustainable and Inclusive Growth in Europe and Beyond. *Journal of the Knowledge Economy* 2014;**5**:212-239.
- 15 Carayannis E, Hens L, Nicolopoulou-Stamati P. TRANS-DISCIPLINARITY AND GROWTH: Nature and Characteristics of Trans-Disciplinary Training Programs on the Human-Environment Interphase. *Journal of the Knowledge Economy* 2017;**8**:1-22.
- 16 Wong C, Lee K. Projecting the Arena of Inclusion: The Case of South Korea in Pursuing a Phased Inclusive Growth Process. *Review of Policy Research* 2018;**35**:590-616.
- 17 Cichowicz E, Rollnik-Sadowska E. Inclusive growth in CEE countries as a determinant of sustainable development. *Sustainability* 2018;**10**:3973.
- 18 de Haan A. Inclusive growth: beyond safety nets? *Eur J Dev Res* 2015;**27**:606-622.
- 19 European Commission (EC). Europe 2020: A strategy for smart, sustainable and inclusive growth. *Working paper* 2010;.
- 20 Feshari M, Valibeigi M. Determinants of Inclusive Growth in Iranian Regions: Sure Approach in Panel Data. *Regional Science Inquiry* 2017;**9**:167-175.
- 21 Fowowe B, Folarin EO. The effects of fragility and financial inequalities on inclusive growth in African countries. *Rev Development Economics* 2019;**23**:1141-1176.
- 22 Gromling M, Klos H. Inclusive Growth--Institutions Matter! *Intereconomics/Review of European Economic Policy* 2019;**54**:184-192.
- 23 Gupta R. Tourism, FDI and Inclusive Growth in India. 2015;**7**:108-114.
- 24 Ianchovichina E, Lundstrom S. Inclusive growth analytics: Framework and application. : The World Bank 2009.
- 25 Hampton MP, Jeyacheya J, Long PH. Can tourism promote inclusive growth? supply chains, ownership and employment in ha long bay, Vietnam. *J Dev Stud* 2017;**54**:1-18.
- 26 Hasmath R. The Paradigms of Inclusive Growth, Development and Welfare Policy. 2015;**18**.
- 27 Heshmati A, Kim J, Wood J. A Survey of Inclusive Growth Policy. *Economies* 2019;**7**:1-18.
- 28 Kanbur R, Rauniyar G. Conceptualizing Inclusive Development: With Applications to Rural Infrastructure and Development Assistance. *Journal of the Asia Pacific Economy* 2010;**15**:437-454.
- 29 Khan A, Khan G, Safdar S, et al. Measurement and Determinants of Inclusive Growth: A Case Study of Pakistan (1990-2012). *Pakistan Development Review* 2016;**55**:455-466.
- 30 Kumah FY, Sandy M. In Search of Inclusive Growth: The Role of Economic Institutions and Policy. *Modern Economy* 2013;**4**:758-775.

- 31 Lederman D. International trade and inclusive growth: a primer. *Indian growth and development review* 2013;**6**:88-112.
- 32 Lee YY, Lee SS. Policy Implications for Inclusive Growth in the Republic of Korea. *Korea and the World Economy* 2013;**14**:607-651.
- 33 Lee N. Inclusive Growth in cities: a sympathetic critique. *Reg Stud* 2018;**53**:1-11.
- 34 Lupton R, Rafferty A, Hughes C. Inclusive growth: Opportunities and challenges for Greater Manchester. *Joseph Rowntree Foundation* 2016;.
- 35 Meyer DF, Meyer N. Assessment of Inclusive Growth performance: A comparative analysis of the BRICS countries. *Acta Universitatis Danubius.Oeconomica* 2019;**15**:n/a.
- 36 Mitchell W. What Is Inclusive Growth? 2012:1-6.
- 37 Mitra A, Das D. Inclusive growth: economics as if people mattered. *Global Business Review* 2018;**19**:756-770.
- 38 Naqvi SNH. The idea of inclusive growth and development policy. *Pakistan development review* 2012;**51**:1-1,21.
- 39 OECD. Time to act: Making inclusive growth happen. *OECD Policy Brief* 2017.
- 40 Osmani SR. The Demands of Inclusive Growth: Lessons from South Asia. *Pakistan Development Review* 2008;**47**:381-400.
- 41 Pacetti EG. The Five Characteristics of an Inclusive Economy: Getting Beyond the Equity-Growth Dichotomy. *The Rockefeller Foundation* 2016.
- 42 Ranieri R, Almeida Ramos R. *Inclusive growth: Building up a concept* 2013.
- 43 Rauniyar G, Kanbur R. Inclusive Growth and Inclusive Development: A Review and Synthesis of Asian Development Bank Literature. *Journal of the Asia Pacific Economy* 2010;**15**:455-469.
- 44 Reed S, Göpfert A, Wood S, et al. Building healthier communities: the role of the NHS as an anchor institution. *London: The Health Foundation* 2019;.
- 45 Rodríguez-Pose A, Tselio V. Toward Inclusive Growth: Is There Regional Convergence in Social Welfare? *International Regional Science Review* 2015;**38**:30.
- 46 Sabir S, Qamar M. Fiscal policy, institutions and inclusive growth: evidence from the developing Asian countries. *IJSE* 2019;**46**:822-837.
- 47 The inclusive growth and development report 2015. Geneva: World economic forum 2015.
- 48 Scottish Government. **Growing the economy**. Available at: <https://www.gov.scot/policies/economic-growth/inclusive-growth/>. Accessed 11/13, 2020.
- 49 Sengupta A. Inclusive growth as rights-based development. *Journal of Asian Public Policy* 2010;**3**:215.
- 50 Statham R. Delivering Inclusive Growth. *IPPR Progressive Review* 2019;**26**:19-30.
- 51 Sud M, VanSandt CV. Identity rights: A structural void in inclusive growth. *J Bus Ethics* 2015;**132**:589-601.
- 52 Swain S. Inclusive Growth in Australia: Social Policy as Economic Investment. 2013;**59**:486-487.
- 53 Swamy V. Financial Development and Inclusive Growth: Impact of Government Intervention in Prioritised Credit. *Zagreb International Review of Economics and Business* 2010;**13**:55-72.

- 54 Vickers I, Westall A, Spear R, et al. Cities, the social economy and inclusive growth: A practice review. 2017.
- 55 Viney, Rani G. How Ethics Support Inclusive Development of Society? *SS International Journal of Business and Management Research* 2013;**3**.
- 56 Zhang T. Toward Inclusive Growth. *Finance and Development* 2017;**54**:26-27.
