# Supplementary material for: Knowing the goal: an inclusive economy that can address the public health challenges of our time
Source: HighWire-hosted journal article supplement (doi:10.1136/jech-2020-216070), 2021-06-22
Supplement: jech-2020-216070supp003_data_supplement.pdf [file jech-2020-216070supp003_data_supplement.pdf]

### Appendix 3: The four attributes of an inclusive economy and the concepts from which they were built

|                                                                                                                                                                                                                                                                                                                                                                                                                                                                                                                                              |                                                                                                                                                                                                             |                                                  |                                                                                                                                                                                                                                                                                                                                                                                                                                                                         |
|----------------------------------------------------------------------------------------------------------------------------------------------------------------------------------------------------------------------------------------------------------------------------------------------------------------------------------------------------------------------------------------------------------------------------------------------------------------------------------------------------------------------------------------------|-------------------------------------------------------------------------------------------------------------------------------------------------------------------------------------------------------------|--------------------------------------------------|-------------------------------------------------------------------------------------------------------------------------------------------------------------------------------------------------------------------------------------------------------------------------------------------------------------------------------------------------------------------------------------------------------------------------------------------------------------------------|
| There is equitable distribution of the benefits of the economy                                                                                                                                                                                                                                                                                                                                                                                                                                                                               | There is equitable access to resources needed to participate in the economy                                                                                                                                 | The economy operates within planetary boundaries | The economy is repurposed                                                                                                                                                                                                                                                                                                                                                                                                                                               |
| <p>Equitable access to employment</p> <p>Equitable access to entrepreneurial opportunities</p> <p>Reduced poverty, disadvantage and inequalities</p> <p>Equitable distribution of the benefits from the economy</p> <p>Inequality reduced in tandem with growth (not as a result of)</p> <p>Equitable opportunity to shape the economy</p> <p>The economy provides an adequate welfare and safety net</p> <p>Equitable access to public goods and services, infrastructure, and other resources</p> <p>There is an expansion of freedoms</p> | <p>Equitable opportunities to access the economy</p> <p>Equitable access to skills and training, decent housing, education and food security</p> <p>Improving and enhancing capabilities (Sen approach)</p> | The economy is environmentally sustainable       | <p>Economy delivers wellbeing (non-economic as well as economic)</p> <p>There is a perspective shift in the purpose of the economy</p> <p>The economy delivers social cohesion, solidarity, belonging, trust</p> <p>The economy delivers high employment</p> <p>There is equitable participation in the design of the economy</p> <p>The economy delivers financial sustainability</p> <p>The institutions reduce legal and social barriers to an inclusive economy</p> |

|                                                          |  |  |                                                          |
|----------------------------------------------------------|--|--|----------------------------------------------------------|
| Equitable participation in the economy and its processes |  |  | The economy improves the quality of life of its citizens |
|----------------------------------------------------------|--|--|----------------------------------------------------------|
